# Supplementary material for: Physics-Informed Optimization of Dross Formation inFiber-Laser Cutting: From Multi-Variable Design to aSingle Decision Rule
Source: Research Square preprint supplement (doi:10.21203/rs.3.rs-8144440/v1), 2025-12-08
Supplement: Supplementary file 1 [file fb64439ca4749816955911e6.xlsx]

## Sheet: Sheet1
Run #	Pu (W)	V (mm/min)	P (MPa)	F (Hz)	FP (mm)	DA (mm2)
1	10000	1.5	7	100	1	15.573
2	2000	0.5	7	100	1	111.29
3	2000	1.5	13	100	1	68.354
4	6000	1	10	2550	1	44.02
5	6000	1	7	2550	−12	98.052
6	6000	1	10	2550	−12	71.573
7	2000	1.5	13	5000	−25	110.09
8	10000	1	10	2550	−12	44.344
9	10000	1.5	13	5000	1	14.757
10	6000	1	10	5000	−12	44.853
11	6000	1	10	2550	−12	61.954
12	2000	0.5	13	5000	1	27.623
13	6000	0.5	10	2550	−12	84.269
14	2000	0.5	7	5000	−25	100.807
15	6000	1	13	2550	−12	48.62
16	6000	1	10	2550	−12	71.954
17	2000	0.5	13	100	−25	93.489
18	6000	1	10	2550	−12	75.547
19	10000	0.5	7	100	−25	79.636
20	10000	1.5	13	100	−25	105.23
21	2000	1	10	2550	−12	120.84
22	2000	1.5	7	100	−25	75.076
23	2000	1.5	7	5000	1	35.483
24	10000	0.5	13	100	1	16.829
25	6000	1	10	2550	−25	85.24
26	10000	1.5	7	5000	−25	21.96
27	10000	0.5	7	5000	1	62.36
28	6000	1	10	2550	−12	72.632
29	10000	0.5	13	5000	−25	38.064
30	6000	1.5	10	2550	−12	55.21
31	6000	1	10	100	−12	70.197
32	6000	1	10	2550	−12	71.752
